# Supplementary material for: Generation of Two Paclitaxel-Resistant High-Grade Serous Carcinoma Cell Lines With Increased Expression of P-Glycoprotein
Source: PubMed Central journal article supplement (PMC8566917; doi:10.3389/fonc.2021.752127), 2021-10-21
Supplement: Image_1.pdf [file Image_1.pdf]

## Supplementary Material

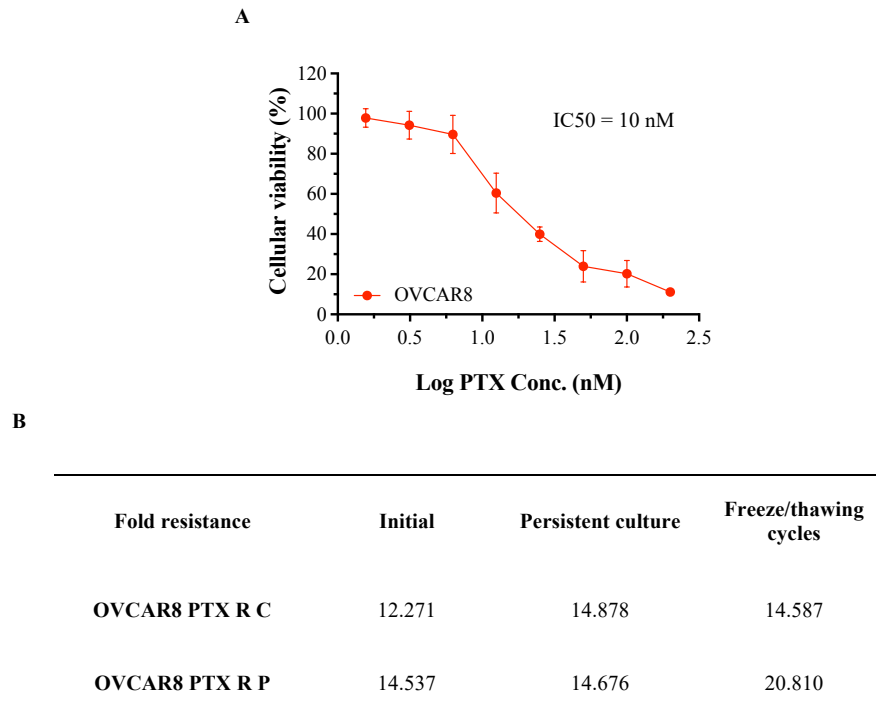

**Supplementary Figure 1. IC<sub>50</sub> and Fold-Resistance for PTX in OVCAR8 and OVCAR8 PTX R cell lines.** (A) Line chart showing cell viability and IC<sub>50</sub> for PTX in OVCAR8 cells obtained by PB assay after exposure to PTX (1.56 to 200 nM) for 48 hours. (B) Table showing PTX fold-resistance for OVCAR8 PTX R cell lines. All assays were done in triplicate in at least three independent experiments. Data is expressed as mean  $\pm$  standard deviation and plotted using GraphPad Prism Software Inc. v6.

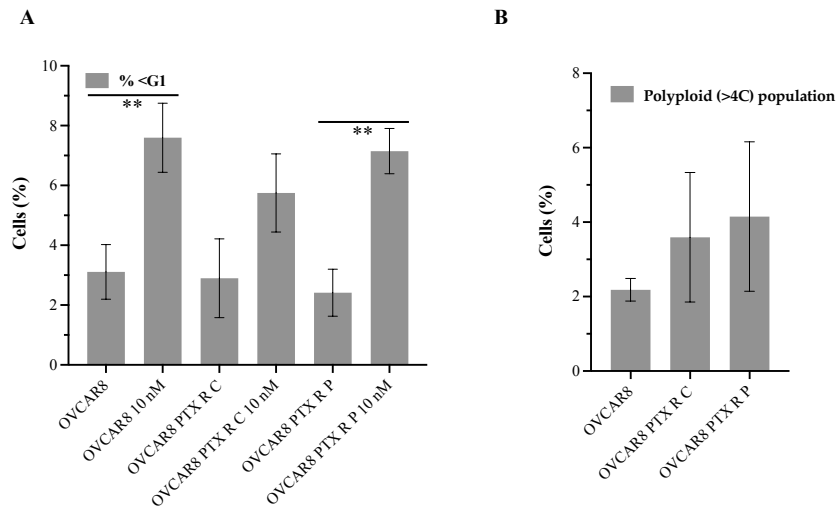

**Supplementary Figure 2. Proportion of Sub-G1 and polyploid (>4C) populations in OVCAR8 and OVCAR8 PTX R cell lines.** (A) Bar chart for cell debris and apoptotic cells (%<G1) of OVCAR8 and OVCAR8 PTX R cell lines using propidium iodide (PI) staining, after exposure to 10 nM PTX during 24 hours. (B) Bar chart showing percentage of polyploid (>4C) populations of OVCAR8 and OVCAR8 PTX R cell lines using propidium iodide (PI) staining. Flow cytometry was performed using BD FACS Canto™ II (BD Biosciences) flow cytometer and data was analyzed by FlowJo software v10.0.7. Assay was done in triplicate in at least three independent experiments. Data is expressed as mean  $\pm$  standard deviation and plotted using GraphPad Prism Software Inc. v6. Statistical analysis was performed using ordinary one-way ANOVA followed by two-way ANOVA followed by Turkey's multiple comparison test (A and B) and values of \*<math><0.05</math>; \*\*<math><0.001</math>; \*\*\*<math><0.0005</math>; \*\*\*\*<math><0.0001</math> as considered statistically significant.
